# Supplementary material
Source: Royal Society of Chemistry journal article supplement (doi:10.1039/d6en00196c)
Supplement: d6en00196c1.pdf [file d6en00196c1.pdf]

## Supplementary materials

**Table S1.** Zeta potential and conductivity of Y-CDs before and after the addition of AZM (mean±SD, n=3)

| Sample              | Zeta Potential (mV) | Conductivity (mS/cm) |
|---------------------|---------------------|----------------------|
| Y-CDs               | +8.96±0.26          | 0.365±0.003          |
| Y-CDs–AZM complexes | -7.25±0.79          | 0.143±0.001          |

**Table S2.** Summary of FT-IR peak assignments and changes upon AZM addition.

| Peak in Y-CDs (cm <sup>-1</sup> ) | Peak in Y-CDs–AZM complexes (cm <sup>-1</sup> ) | Change                                                 | Assignment                                                            | Mechanistic Implication                                                                                   |
|-----------------------------------|-------------------------------------------------|--------------------------------------------------------|-----------------------------------------------------------------------|-----------------------------------------------------------------------------------------------------------|
| ~3465 (broad)                     | ~3450 (narrow)                                  | Blue shift (~15 cm <sup>-1</sup> ), narrowing          | O–H/N–H stretching                                                    | Reorganization of hydrogen bonding network; formation of directional hydrogen bonds between Y-CDs and AZM |
| —                                 | ~2925                                           | New peak                                               | C–H stretching (–CH <sub>3</sub> , –CH <sub>2</sub> –)                | Characteristic peak of AZM alkyl chains; confirms successful binding of AZM onto Y-CD surface             |
| ~1666 (strong)                    | ~1603 (weak)                                    | Red shift (~63 cm <sup>-1</sup> ), intensity decrease  | C=O/C=N stretching                                                    | Coordination or electrostatic interaction involving carbonyl groups; decreased electron cloud density     |
| ~1404 (weak)                      | ~1385 (strong)                                  | Red shift (~19 cm <sup>-1</sup> ), intensity increase  | –COO <sup>-</sup> /–SO <sub>3</sub> <sup>-</sup> symmetric stretching | Electrostatic attraction between negatively charged groups and protonated tertiary amine of AZM           |
| ~1243                             | —                                               | Disappeared                                            | C–O/C–N stretching                                                    | Functional groups involved in interaction; vibrational modes suppressed or coupled                        |
| —                                 | ~1112, ~1045 (doublet)                          | New peaks                                              | C–O–C ether linkage/S=O stretching                                    | Characteristic vibrations of AZM ether bonds and Y-CD sulfonic acid groups; interfacial binding           |
| ~850 (weak)                       | ~680 (strong)                                   | Red shift (~170 cm <sup>-1</sup> ), intensity increase | Aromatic C–H out-of-plane bending                                     | $\pi$ - $\pi$ stacking between aromatic domains of Y-CDs and conjugated lactone ring of AZM               |

**Table S3.** Recovery experiments using paper-based smartphone platform in real samples.

| Sample     | Added ( $\mu\text{mol/L}$ ) | Found ( $\mu\text{mol/L}$ ) | RSD (% , n = 6) | Recovery (%) |
|------------|-----------------------------|-----------------------------|-----------------|--------------|
| Tap water  | 137.5                       | 120.27                      | 2.13            | 87.47        |
|            | 162.5                       | 138.95                      | 3.21            | 85.51        |
|            | 187.5                       | 166.02                      | 2.58            | 88.54        |
| Pond water | 137.5                       | 119.10                      | 2.15            | 86.61        |
|            | 162.5                       | 139.28                      | 2.59            | 85.71        |
|            | 187.5                       | 157.81                      | 3.04            | 84.17        |
| Milk       | 137.5                       | 100.35                      | 4.17            | 72.98        |
|            | 162.5                       | 125.06                      | 3.59            | 76.96        |
|            | 187.5                       | 127.66                      | 4.03            | 68.08        |

**Table S4.** Reproducibility across different smartphone devices

| Sample     | Test instrument | Added ( $\mu\text{mol/L}$ ) | B/G ratio | Found ( $\mu\text{mol/L}$ ) | RSD (% , n = 6) | Recovery (%) |
|------------|-----------------|-----------------------------|-----------|-----------------------------|-----------------|--------------|
| Tap water  | iPhone 16Pro    | 137.5                       | 1.0179    | 120.27                      | 2.13            | 87.47        |
|            |                 | 162.5                       | 1.0461    | 138.95                      | 3.21            | 85.51        |
|            |                 | 187.5                       | 1.087     | 166.02                      | 2.58            | 88.54        |
|            | Xiaomi 13       | 137.5                       | 1.0159    | 118.95                      | 1.98            | 86.51        |
|            |                 | 162.5                       | 1.0427    | 136.70                      | 3.36            | 84.12        |
|            |                 | 187.5                       | 1.0729    | 156.66                      | 2.57            | 83.55        |
| Pond water | iPhone 16Pro    | 137.5                       | 1.0162    | 119.10                      | 2.15            | 86.61        |
|            |                 | 162.5                       | 1.0466    | 139.28                      | 2.59            | 85.71        |
|            |                 | 187.5                       | 1.0746    | 157.81                      | 3.04            | 84.17        |
|            | Xiaomi 13       | 137.5                       | 1.0147    | 118.84                      | 2.16            | 85.92        |
|            |                 | 162.5                       | 1.0416    | 135.93                      | 2.51            | 83.65        |
|            |                 | 187.5                       | 1.0675    | 153.13                      | 2.87            | 81.67        |
| Milk       | iPhone 16Pro    | 137.5                       | 0.9878    | 100.35                      | 4.17            | 72.98        |
|            |                 | 162.5                       | 1.0252    | 125.06                      | 3.59            | 76.96        |
|            |                 | 187.5                       | 1.0292    | 127.66                      | 4.03            | 68.08        |
|            | Xiaomi 13       | 137.5                       | 0.9890    | 101.13                      | 4.01            | 73.55        |
|            |                 | 162.5                       | 1.0078    | 113.56                      | 3.69            | 69.88        |
|            |                 | 187.5                       | 1.0217    | 122.79                      | 4.18            | 65.49        |

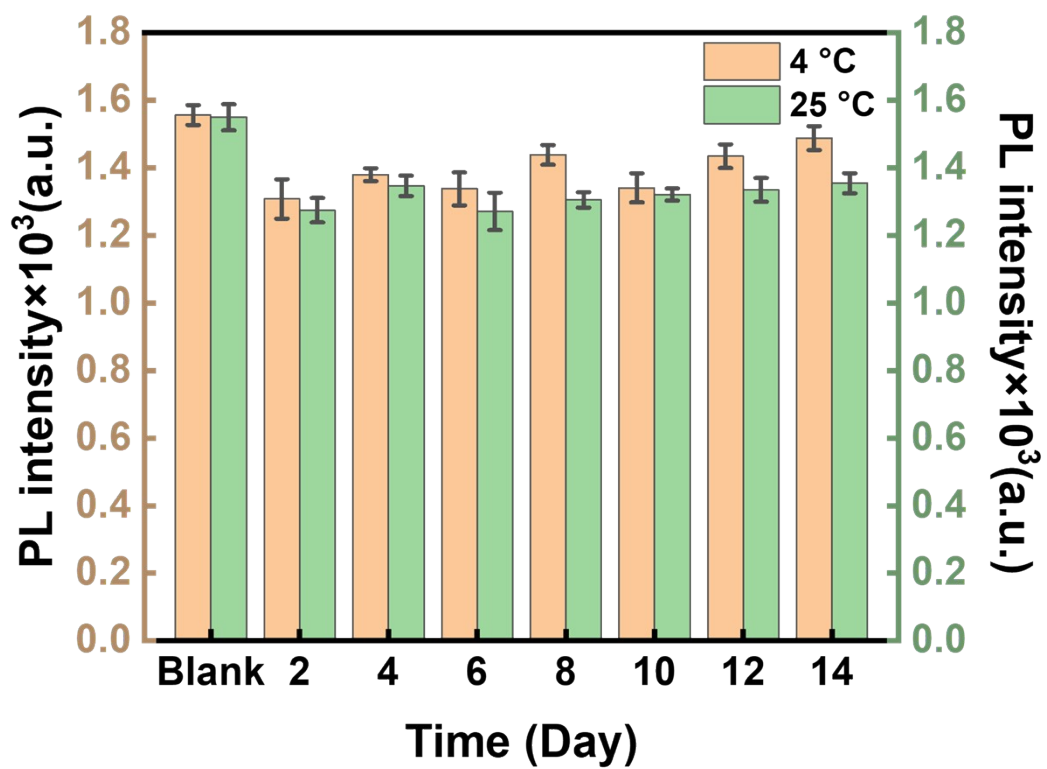

Figure S1. Stability of paper-based test strips stored under different conditions (4 °C and 25 °C) over 14 days.
